# Supplementary material
Source: PubMed Central journal article supplement (PMC4143992)

A

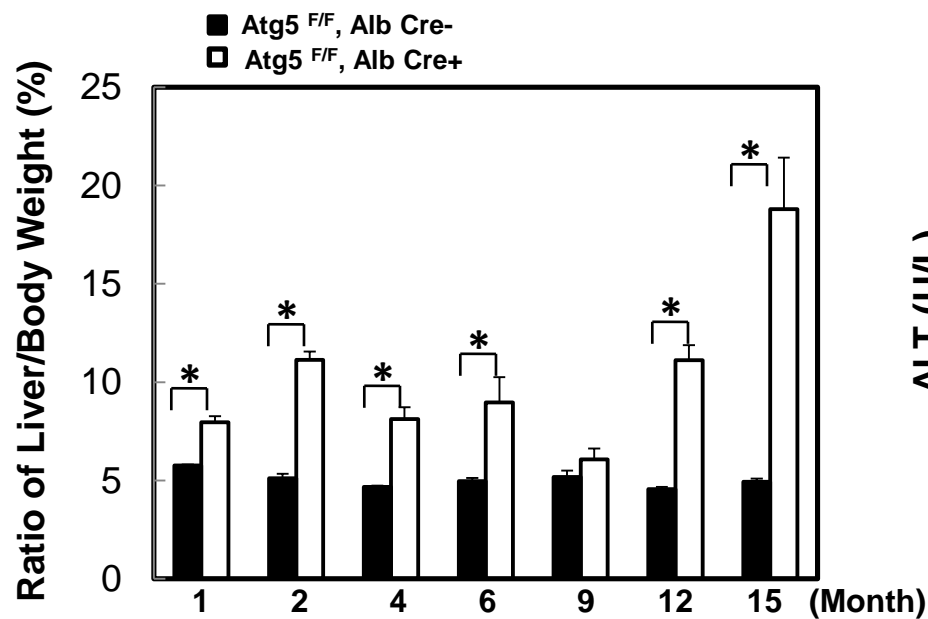

B

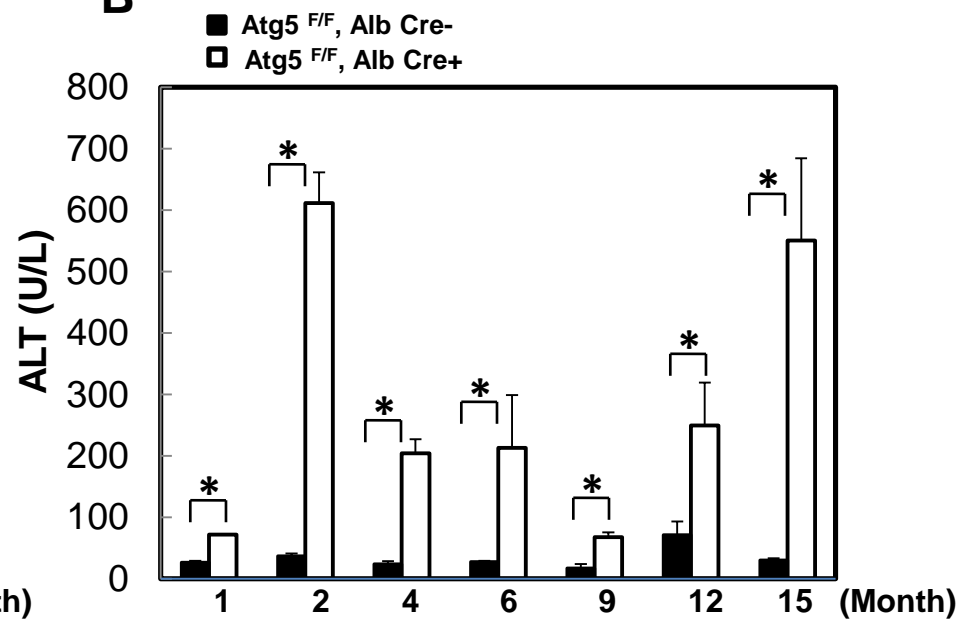

C

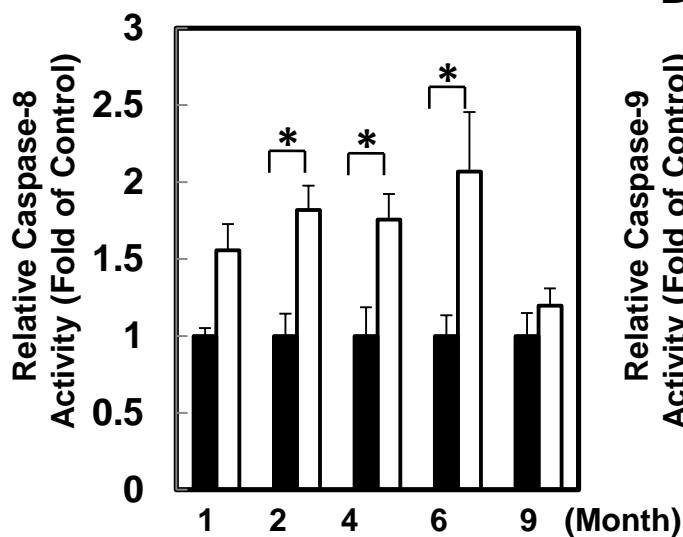

D

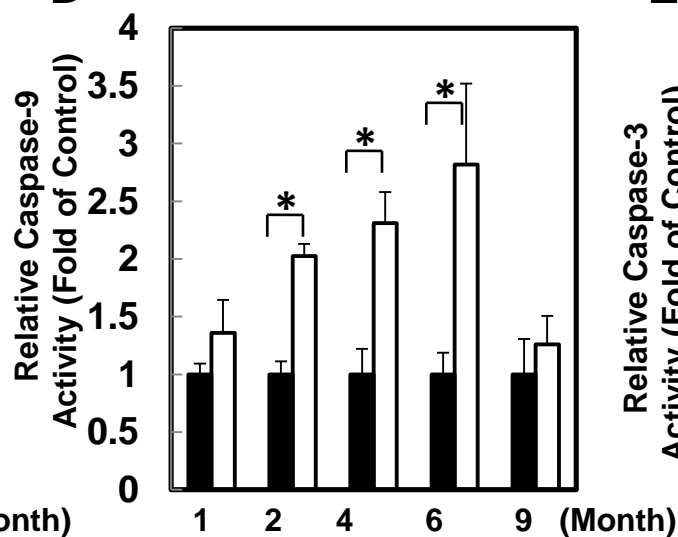

E

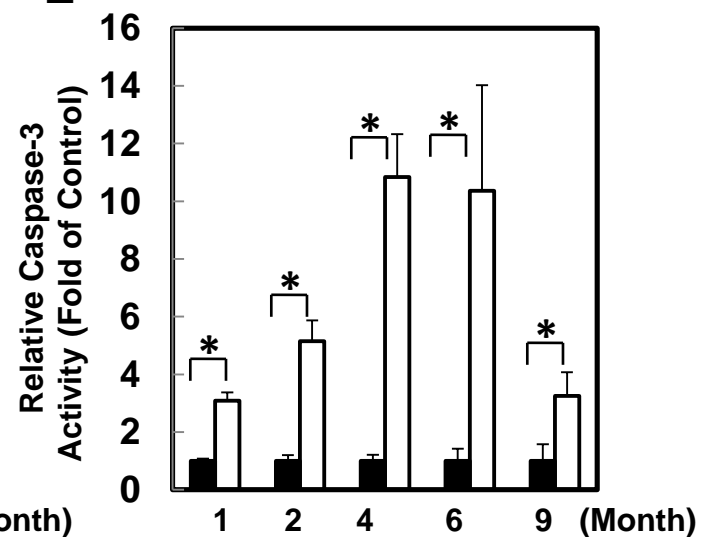

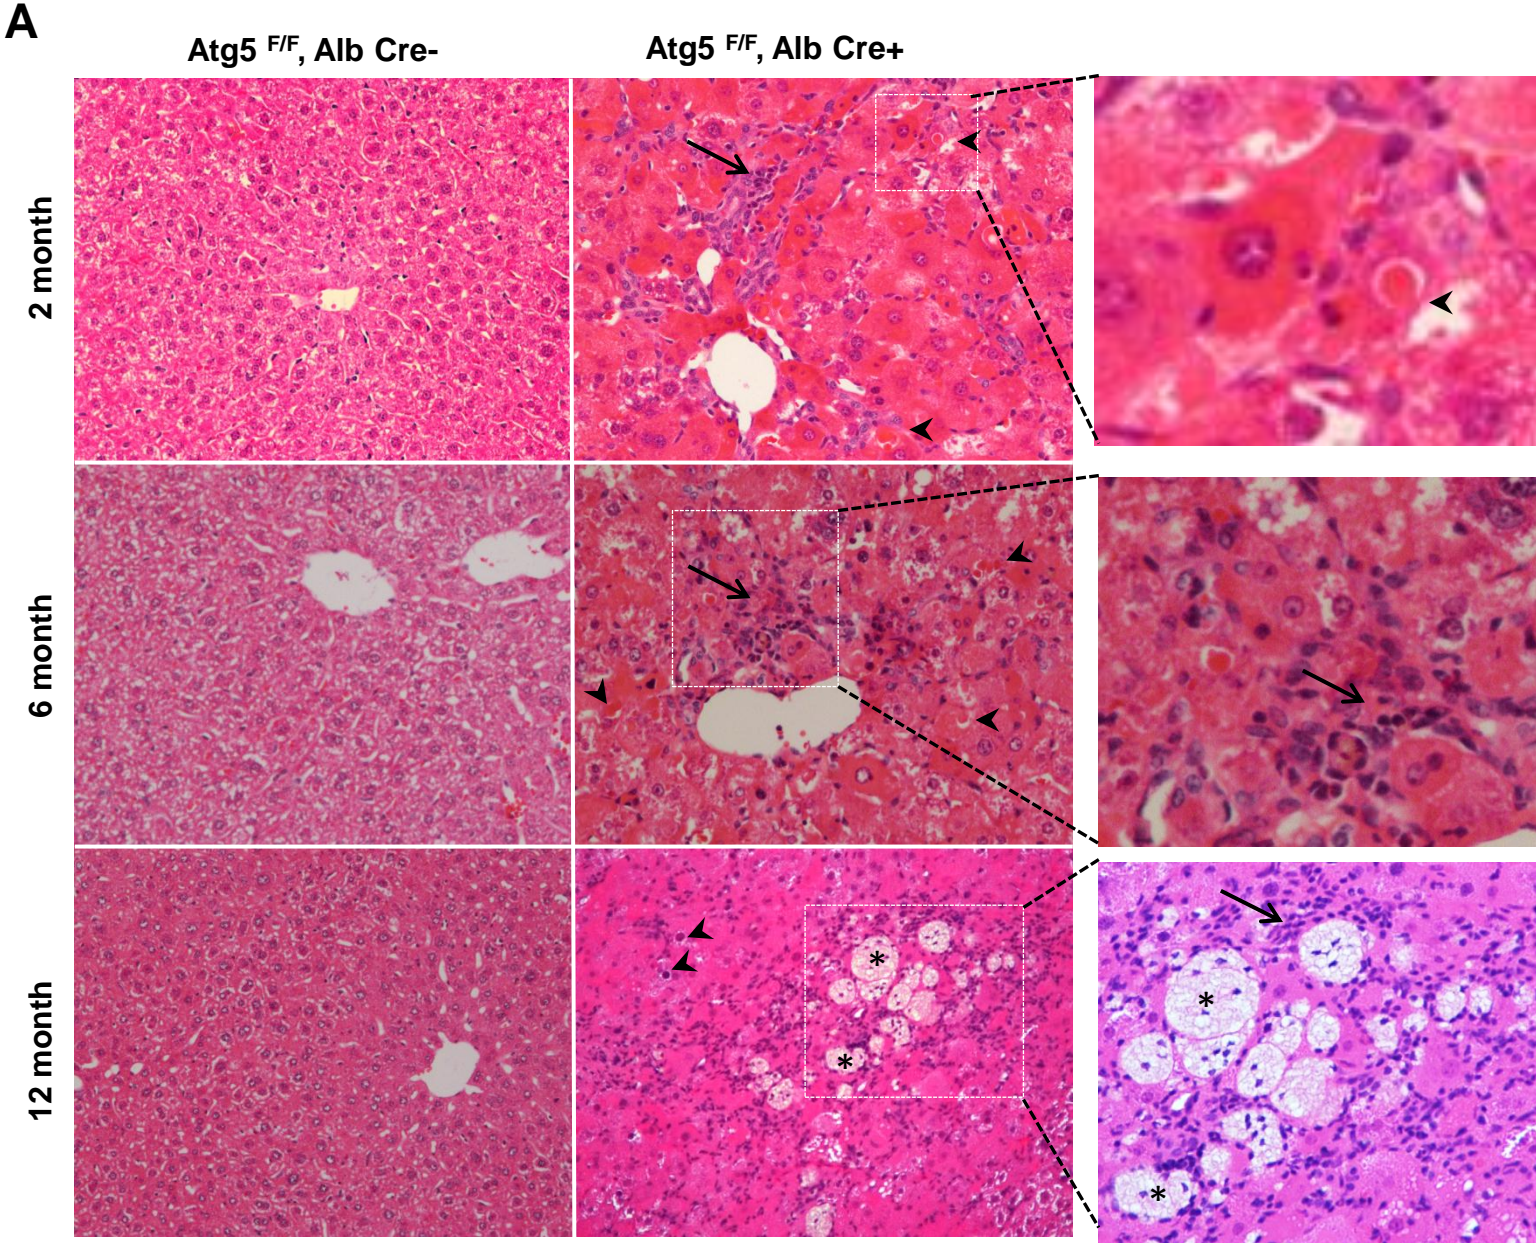



**B**Atg5<sup>F/F</sup>, Alb Cre-Atg5<sup>F/F</sup>, Alb Cre+

Neutrophils

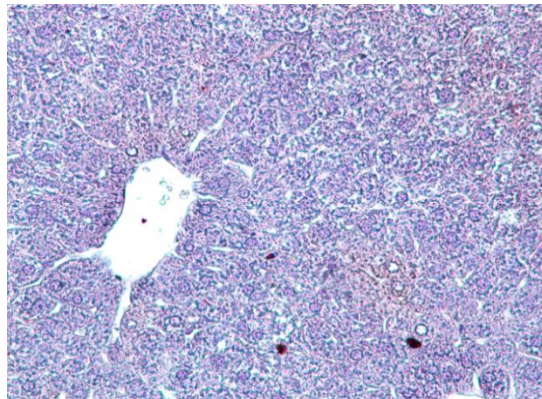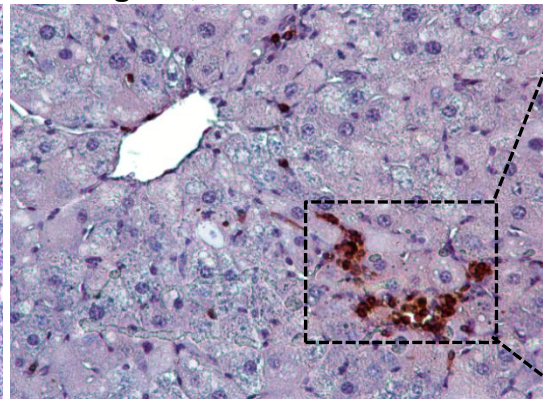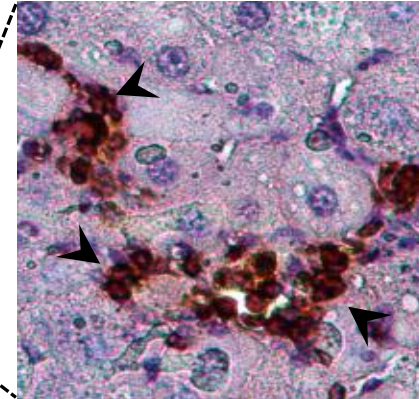

Macrophage (F4/80)

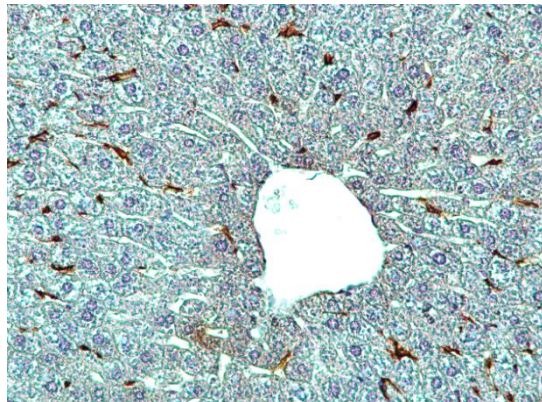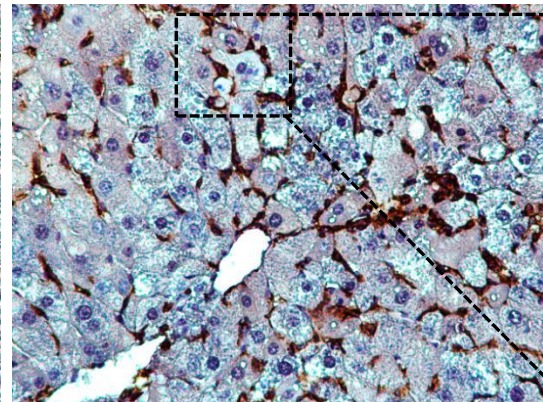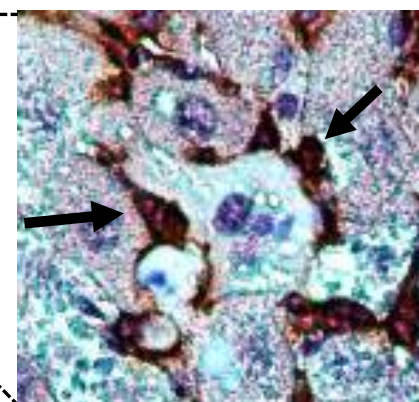**C**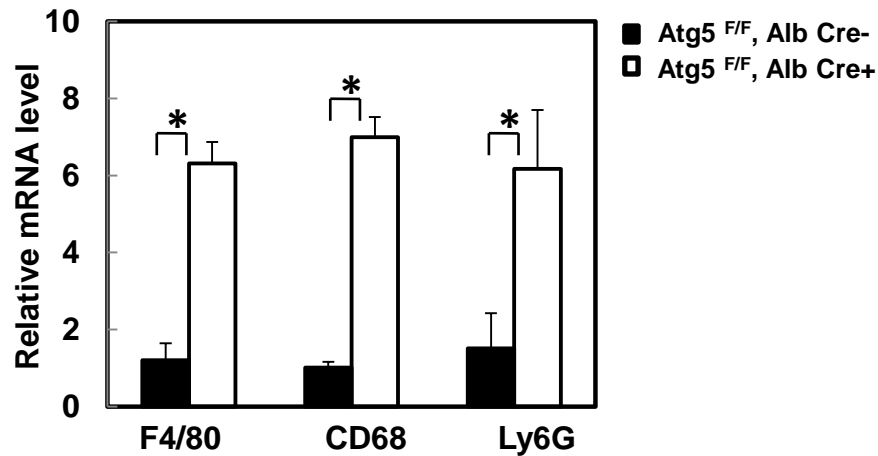**D**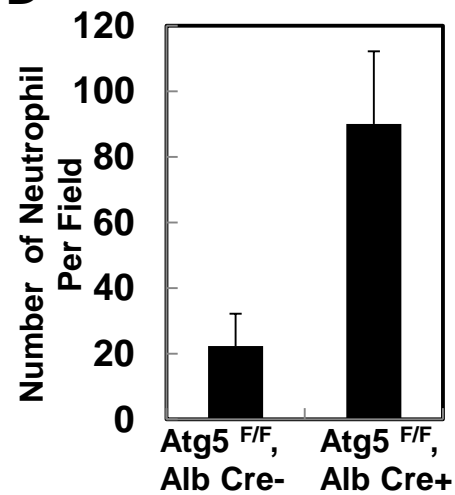**E**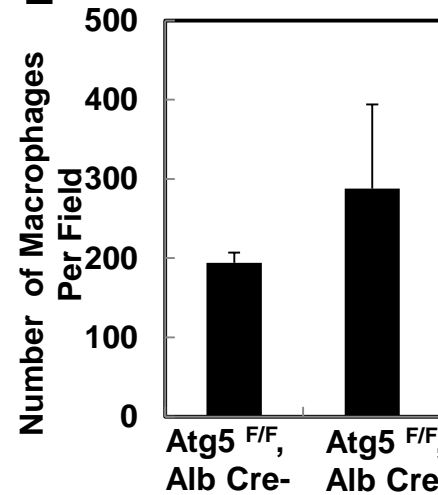

# Supplemental Figure 3

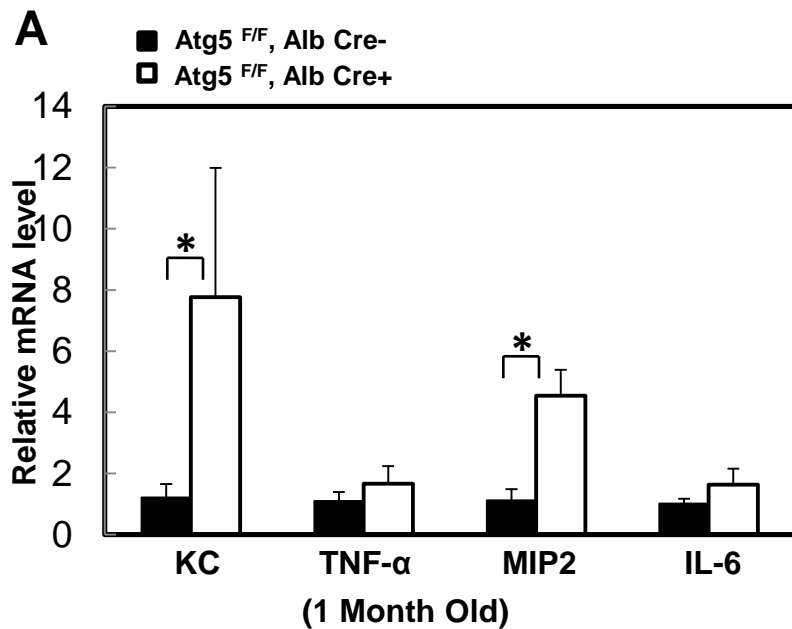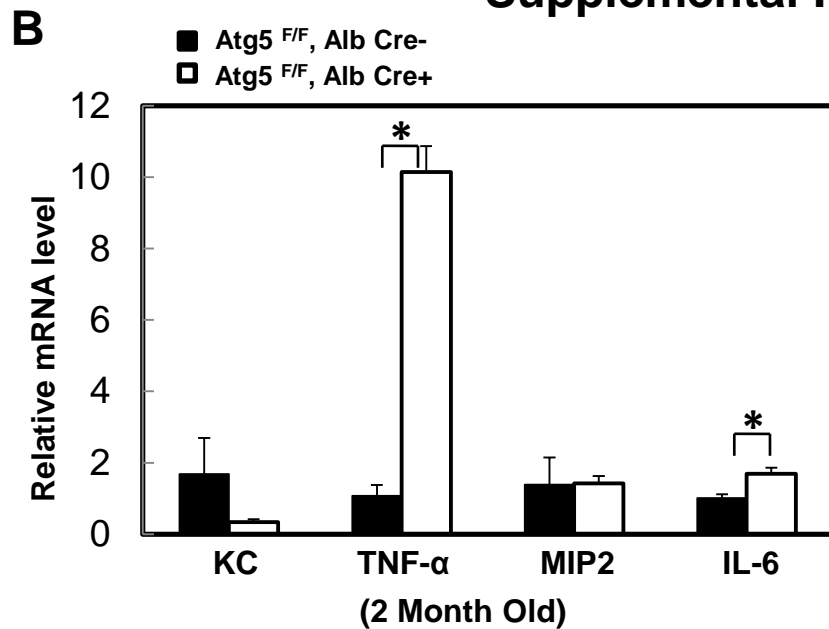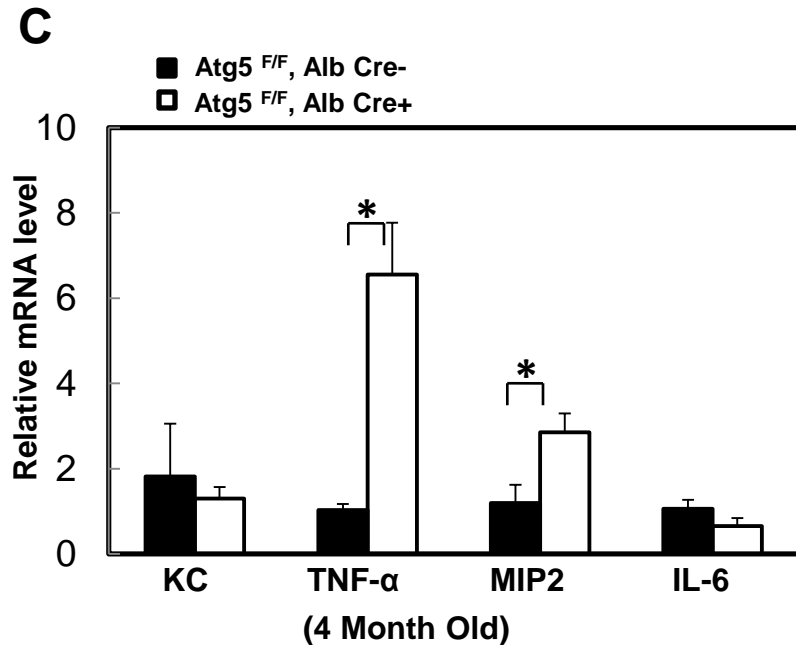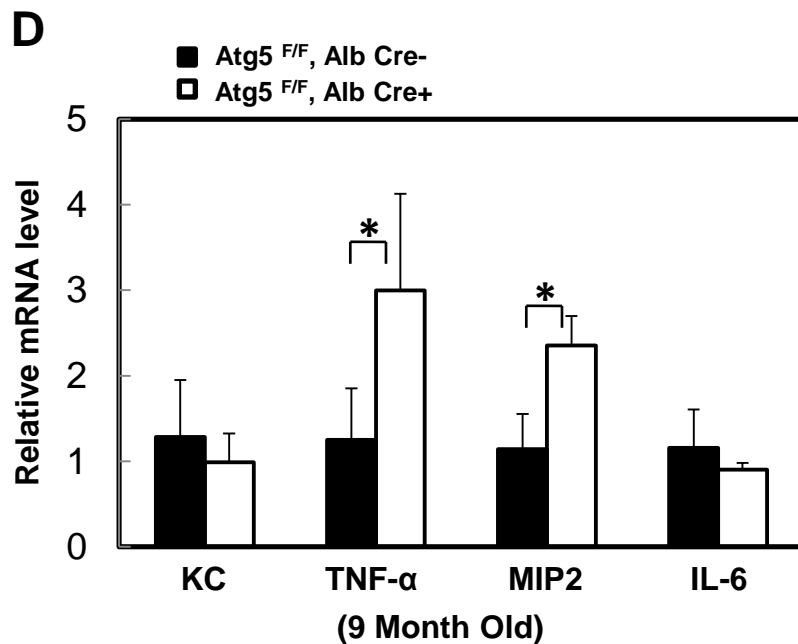

A

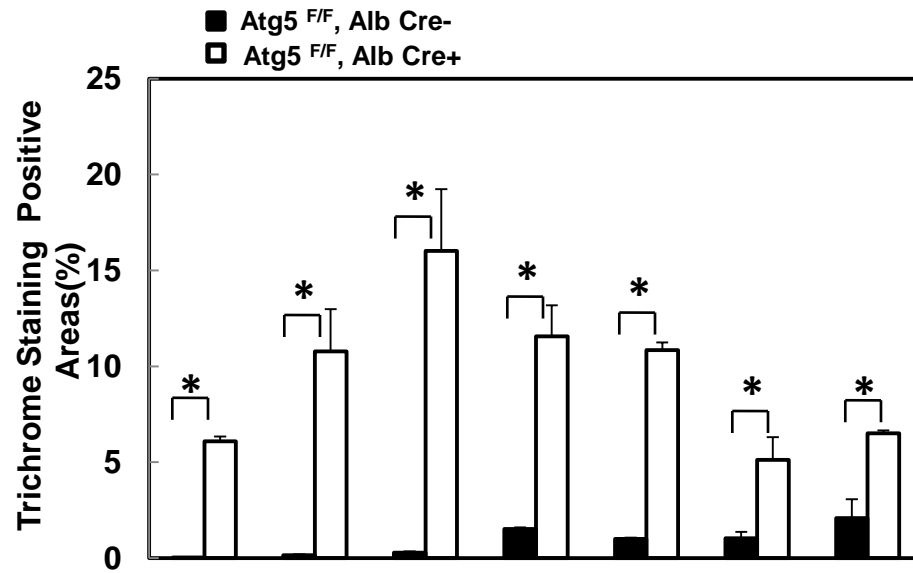

B

Atg5<sup>F/F</sup>, Alb Cre-Atg5<sup>F/F</sup>, Alb Cre+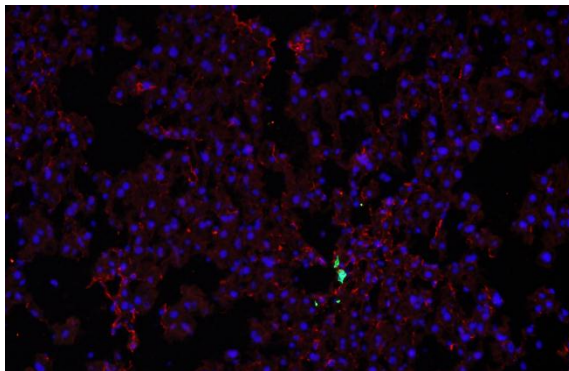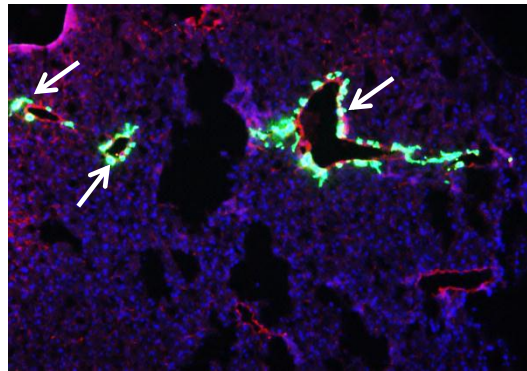

Collagen staining;  
CK-19 staining



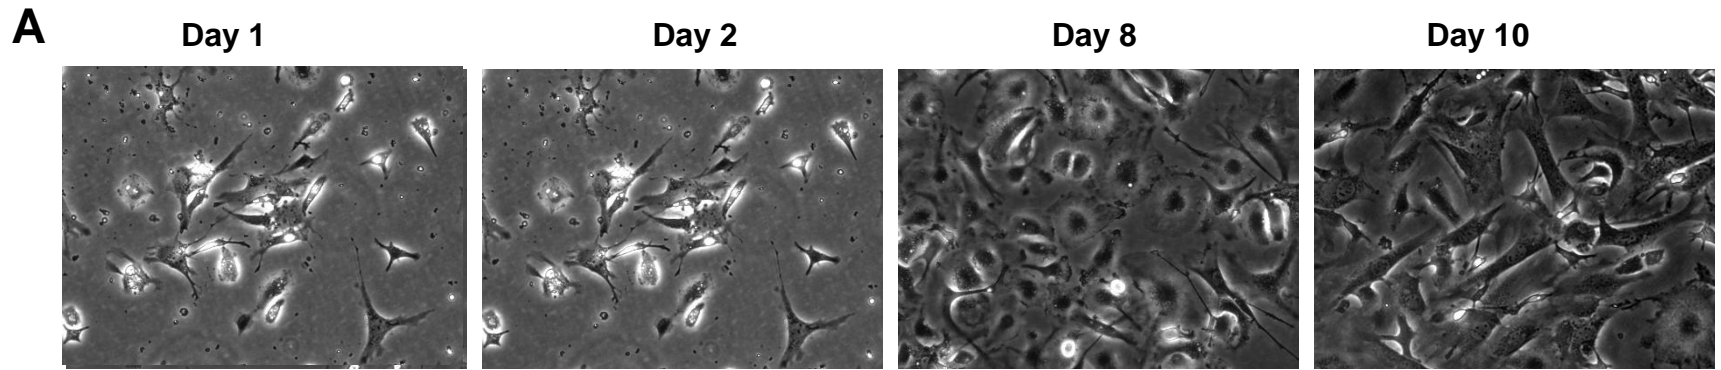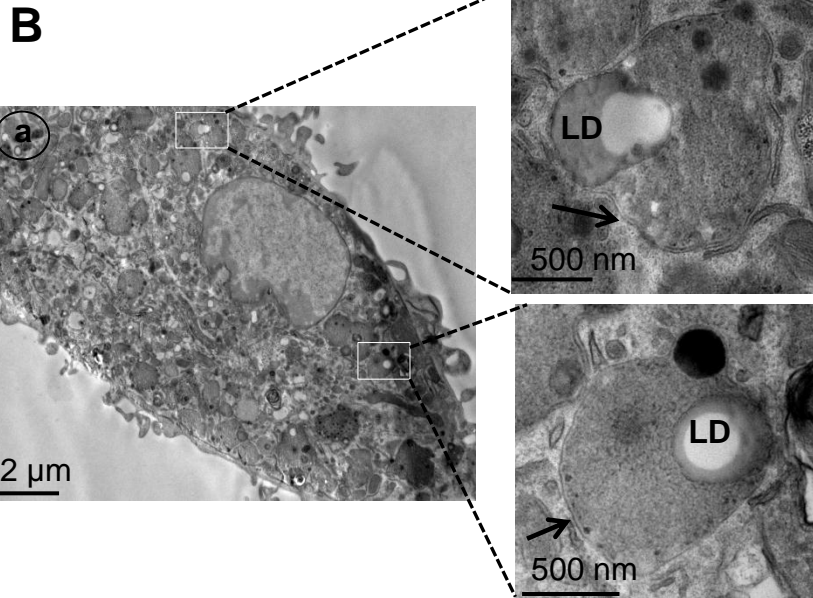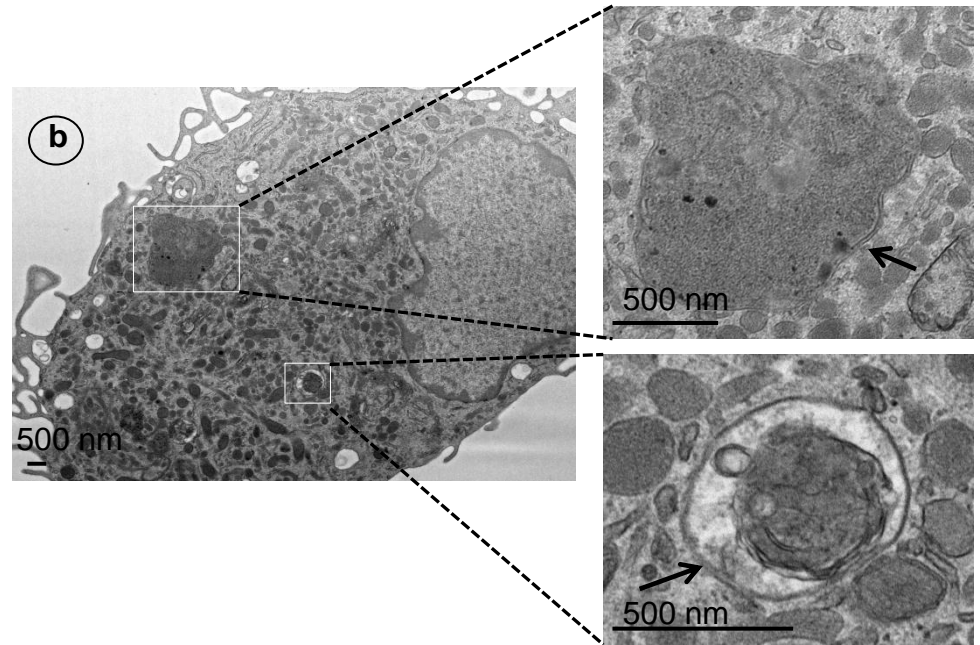

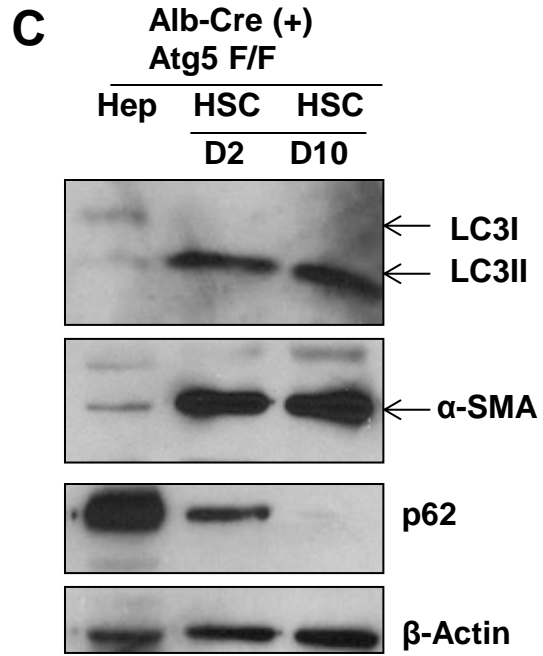

# Supplemental Figure 6

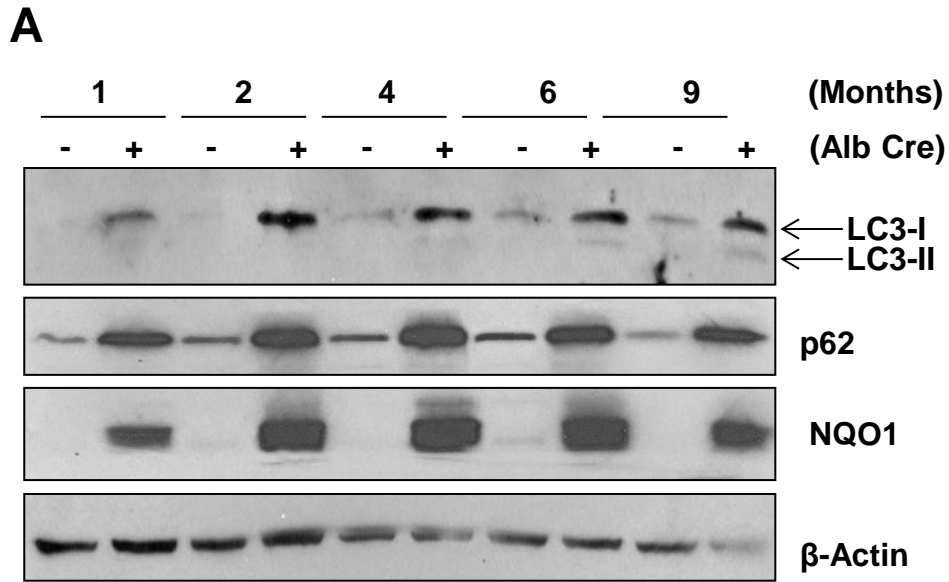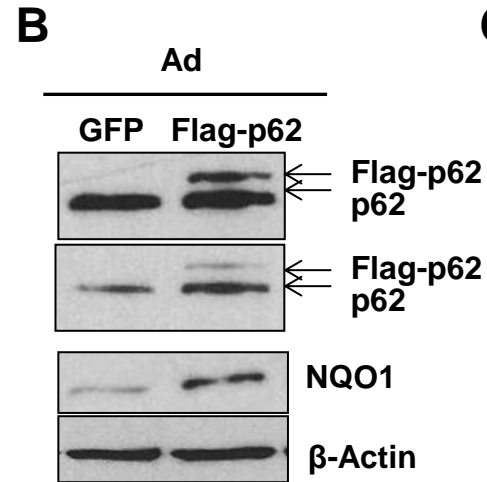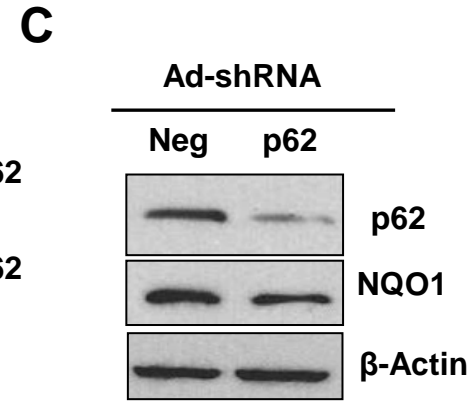



A

Atg5<sup>F/F</sup>, Alb Cre+Atg5<sup>F/F</sup>, Alb Cre+/Nrf2<sup>-/-</sup>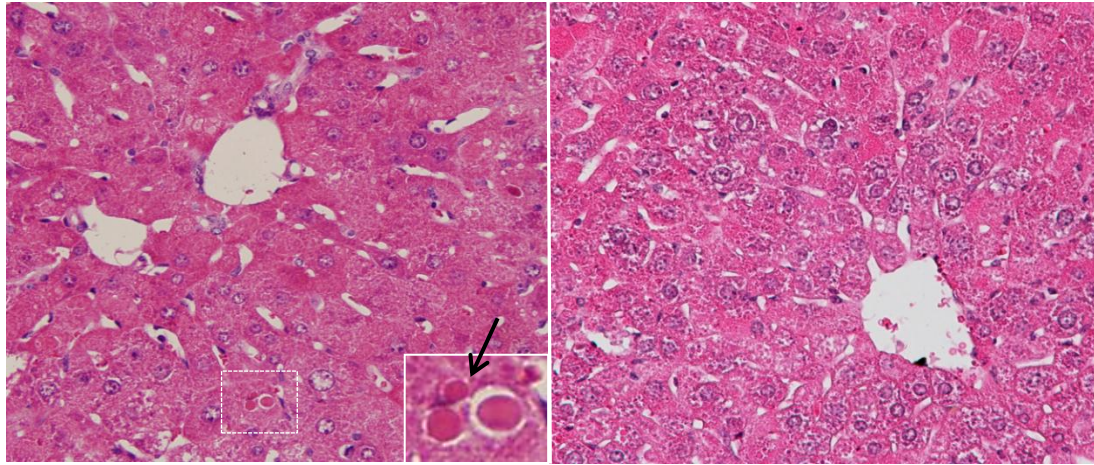

B

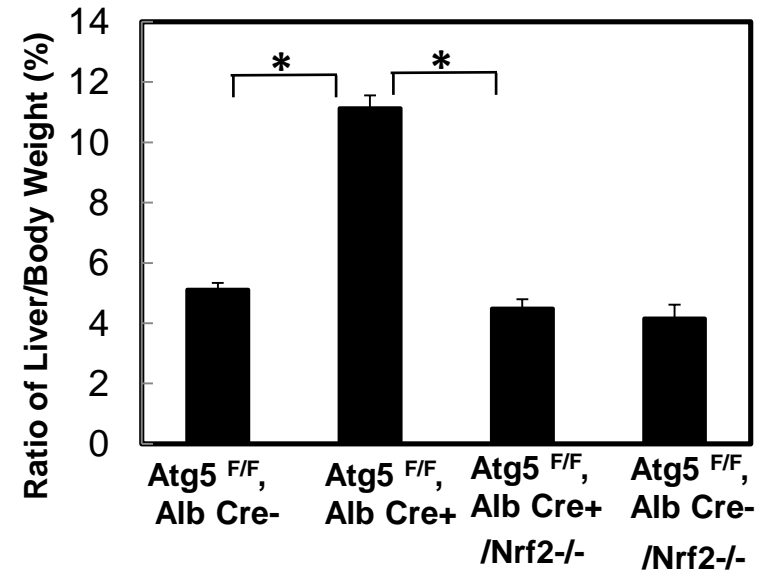

C

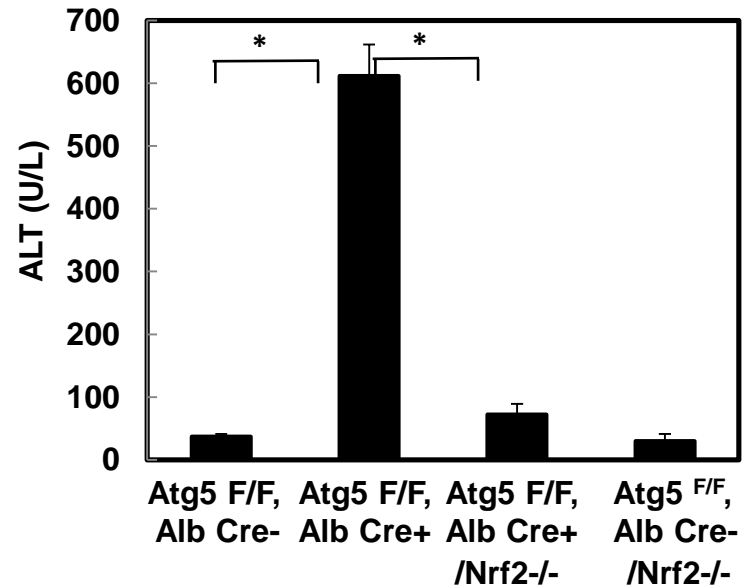

A

Atg5<sup>F/F</sup>, Alb Cre+, 12M

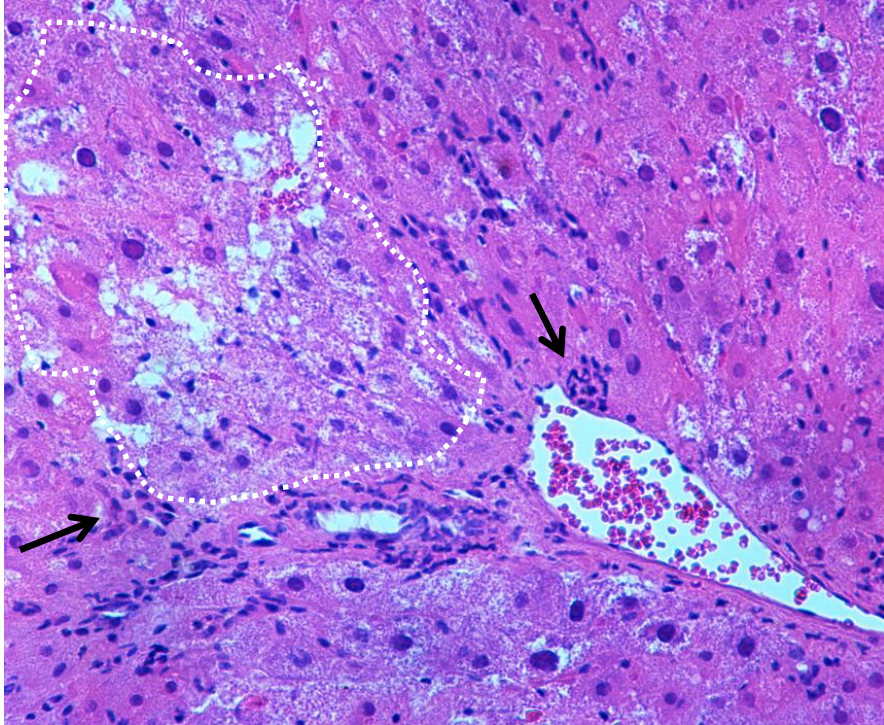

Atg5<sup>F/F</sup>, Alb Cre+/Nrf2<sup>-/-</sup>, 12M

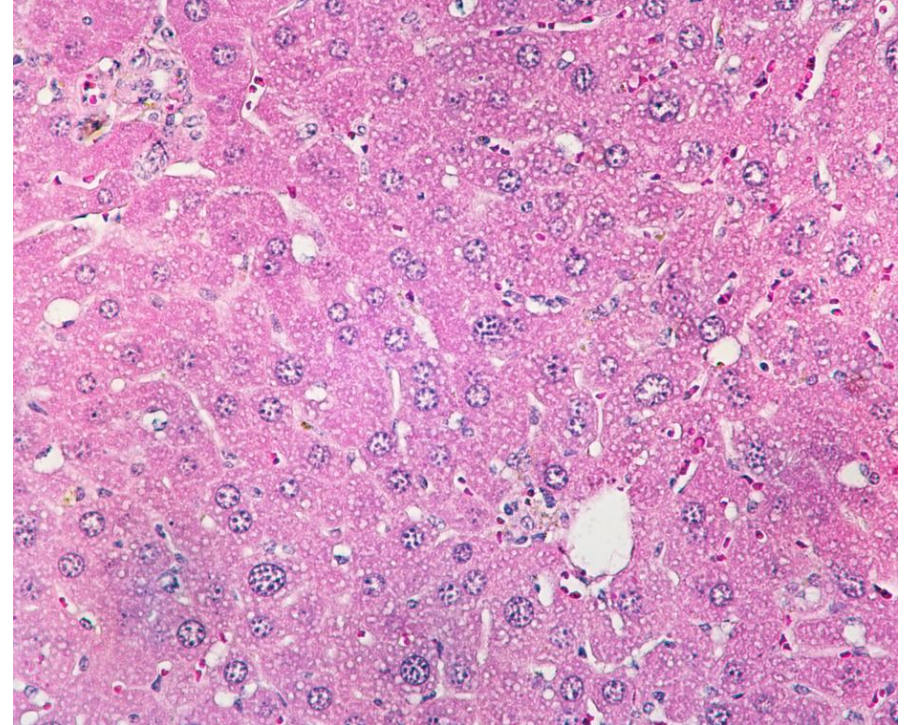



B

Atg5<sup>F/F</sup>, Alb Cre+, 12M

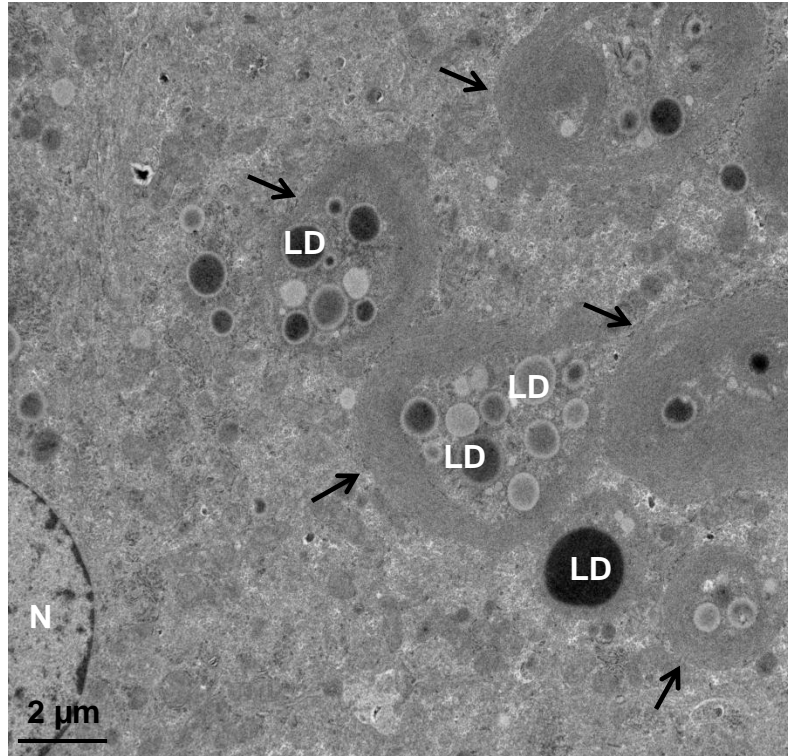

Atg5<sup>F/F</sup>, Alb Cre+/Nrf2<sup>-/-</sup>, 12M

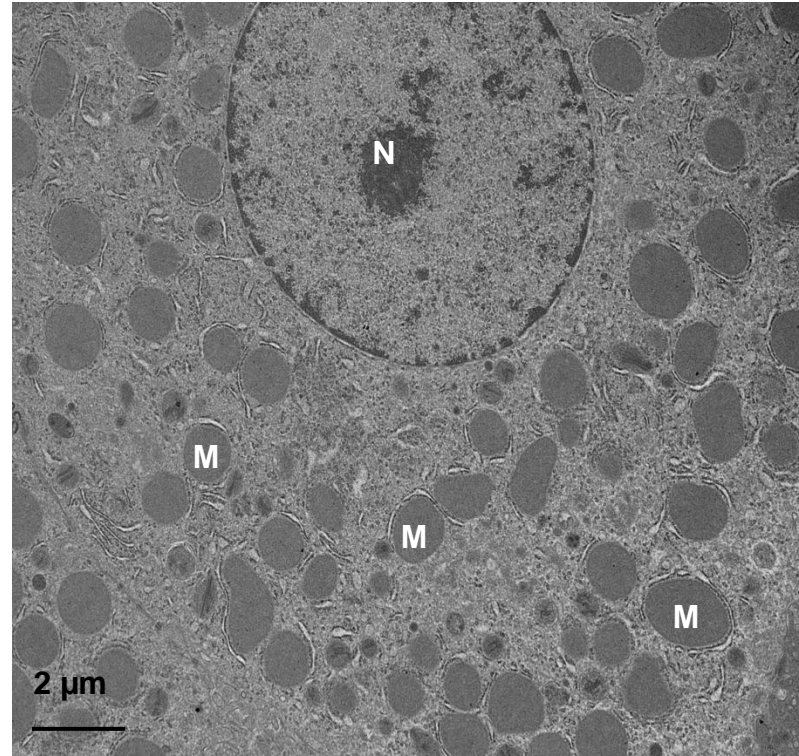

C

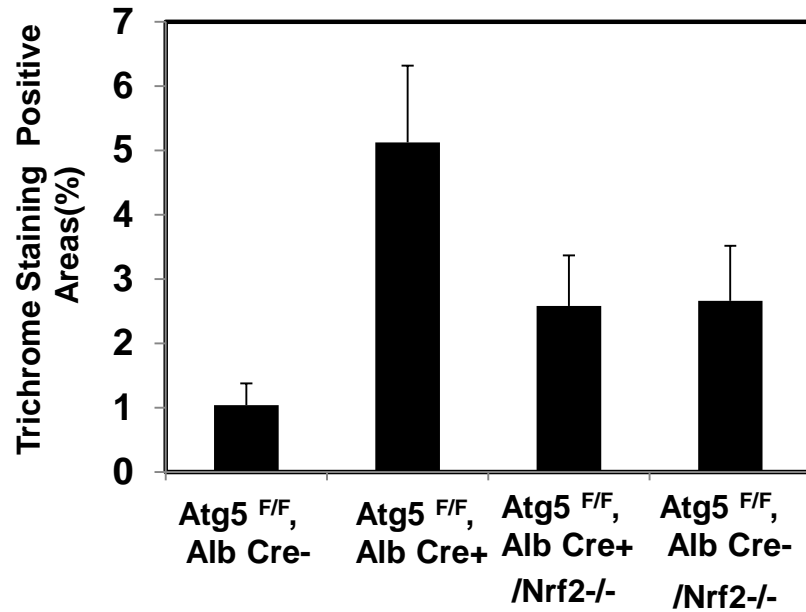

D

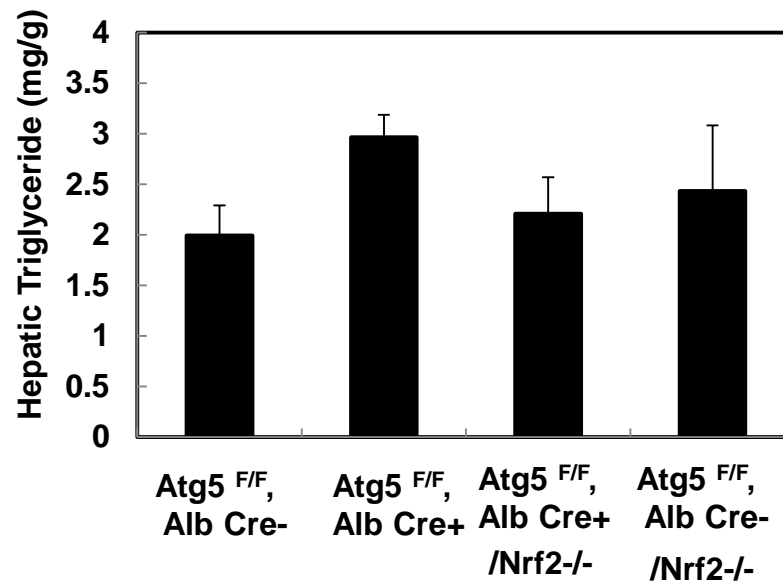



# Supplemental Figure 9

## A

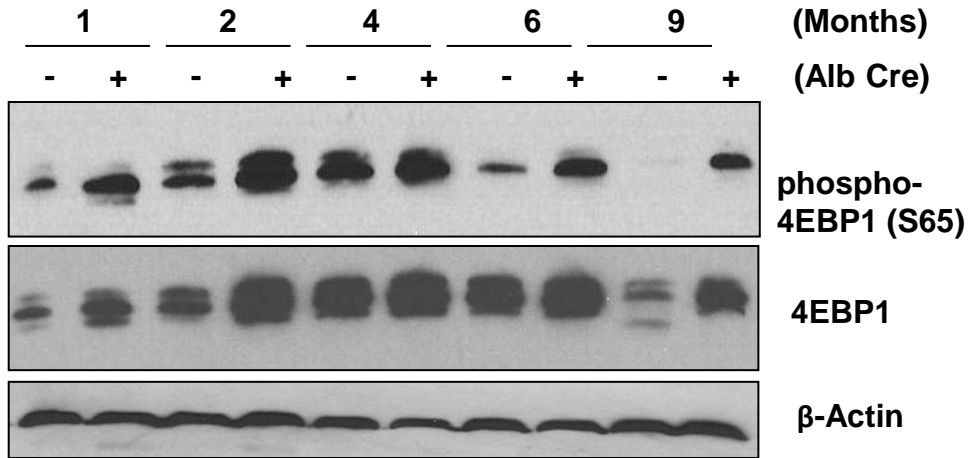

## B

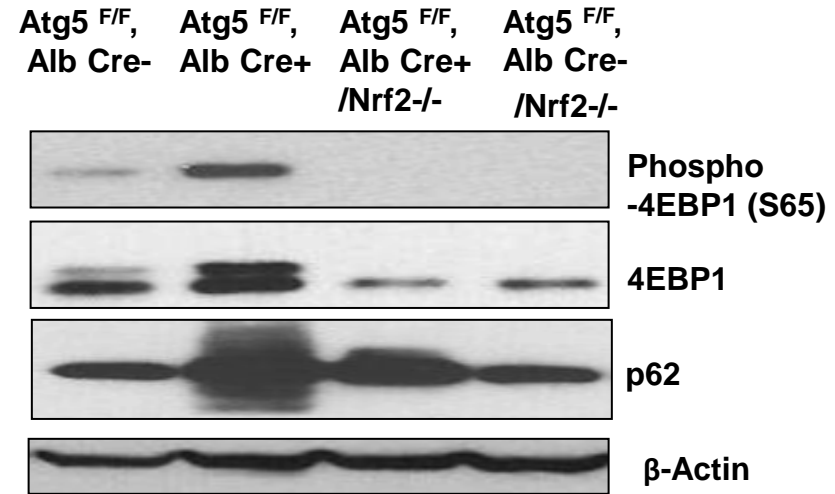

C

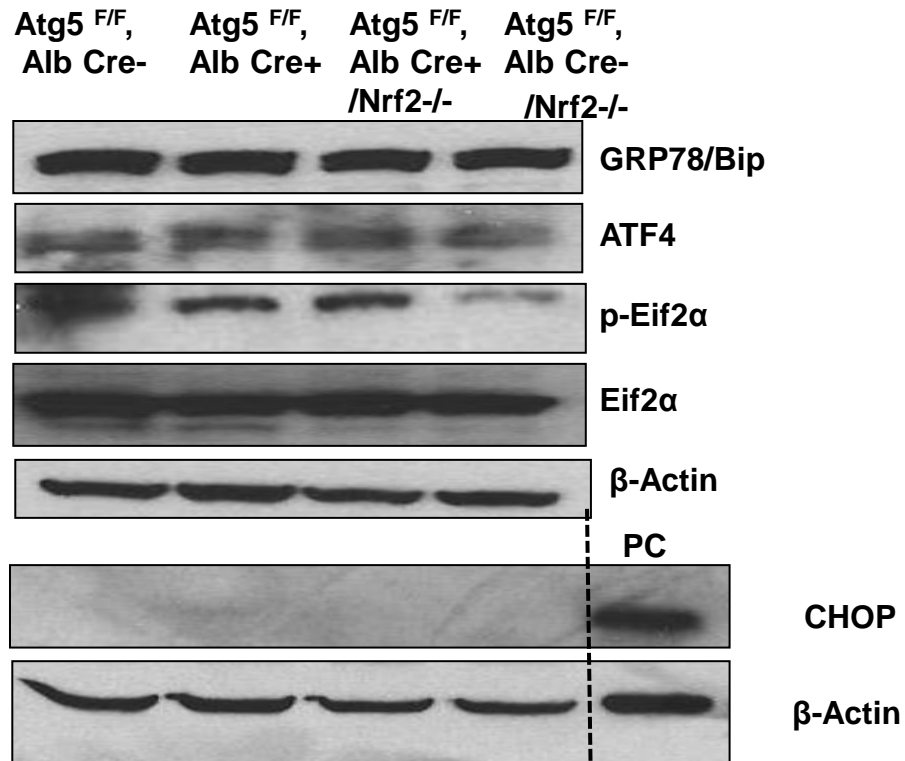

Atg5<sup>F/F</sup>, Alb Cre<sup>-</sup>, 12M

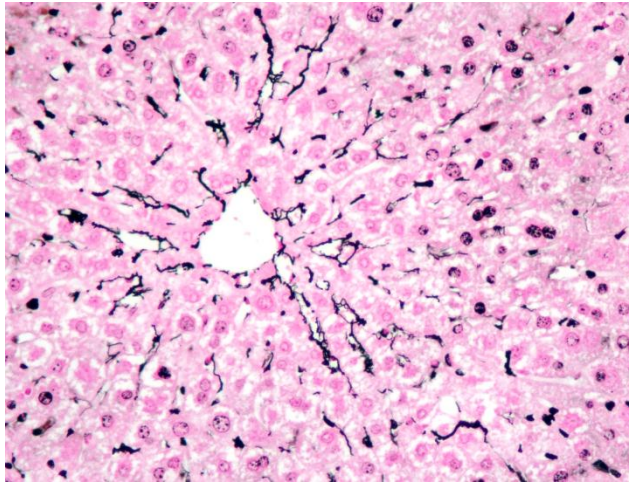

Atg5<sup>F/F</sup>, Alb Cre<sup>+</sup>, 12M

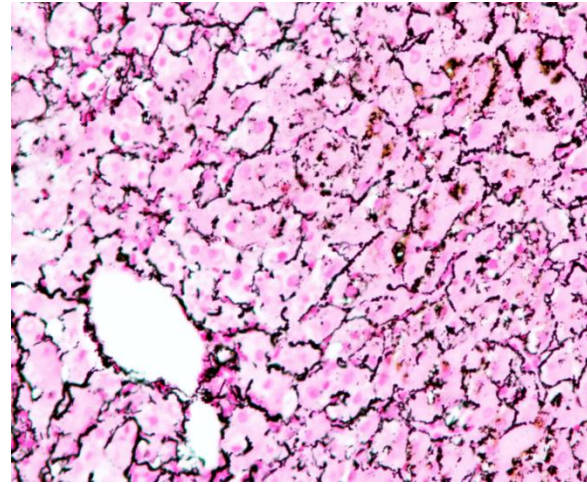

**A**

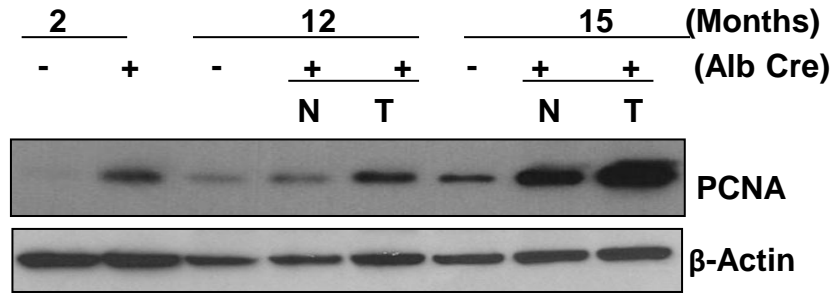

**B**

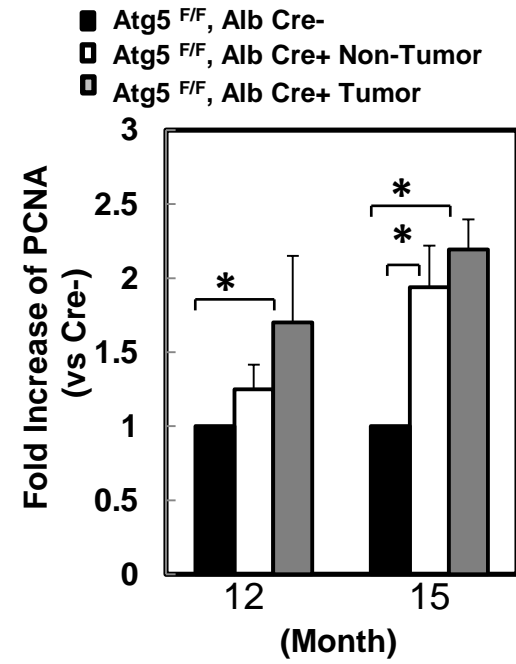

Supplement: NIHMS616143-supplement-01.pdf [file NIHMS616143-supplement-01.pdf]
